# Supplementary material
Source: Springer Nature journal article supplement (https://www.springermedizin.de/resource/supplementary/12974_2011_455_MOESM2_ESM.pdf/9601342)

**A****LPS**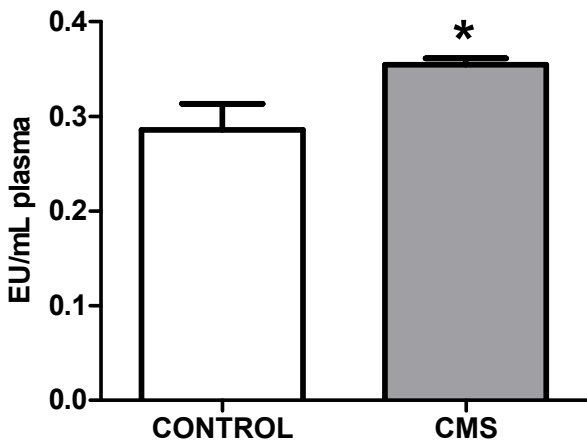**B****LBP**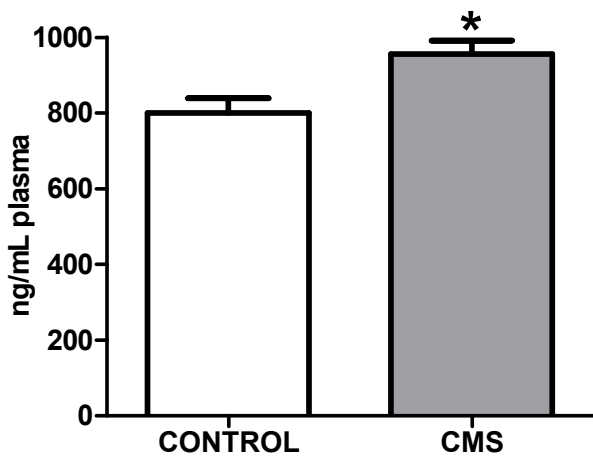

Supplement: MOESM2 [file 9601342]
